# Supplementary material for: Chloro-aluminium phthalocyanine loaded in ultradeformable liposomes for photobiology studies on human glioblastoma
Source: Royal Society of Chemistry journal article supplement (doi:10.1039/c6ra16015h), 2016-01-01
Supplement: c6ra16015h1.pdf [file c6ra16015h1.pdf]

### Supplementary information Long term formulation stability

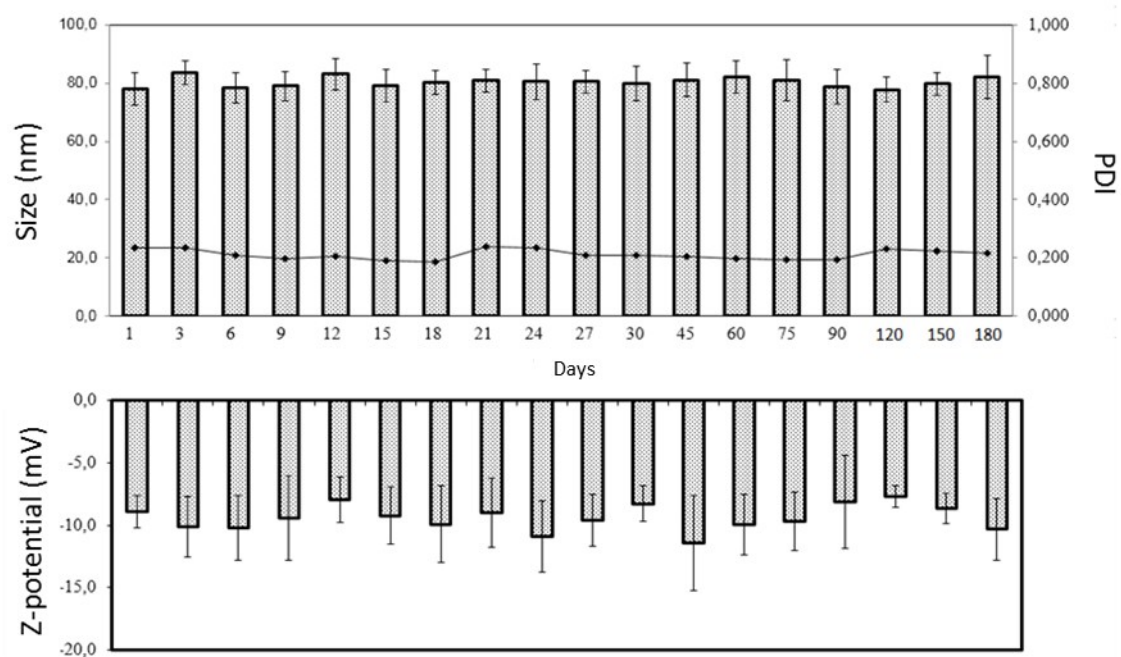

**Fig 1:** The long term stability of ultradeformable liposome with Tween 80 (UDLT80) for 180 days.

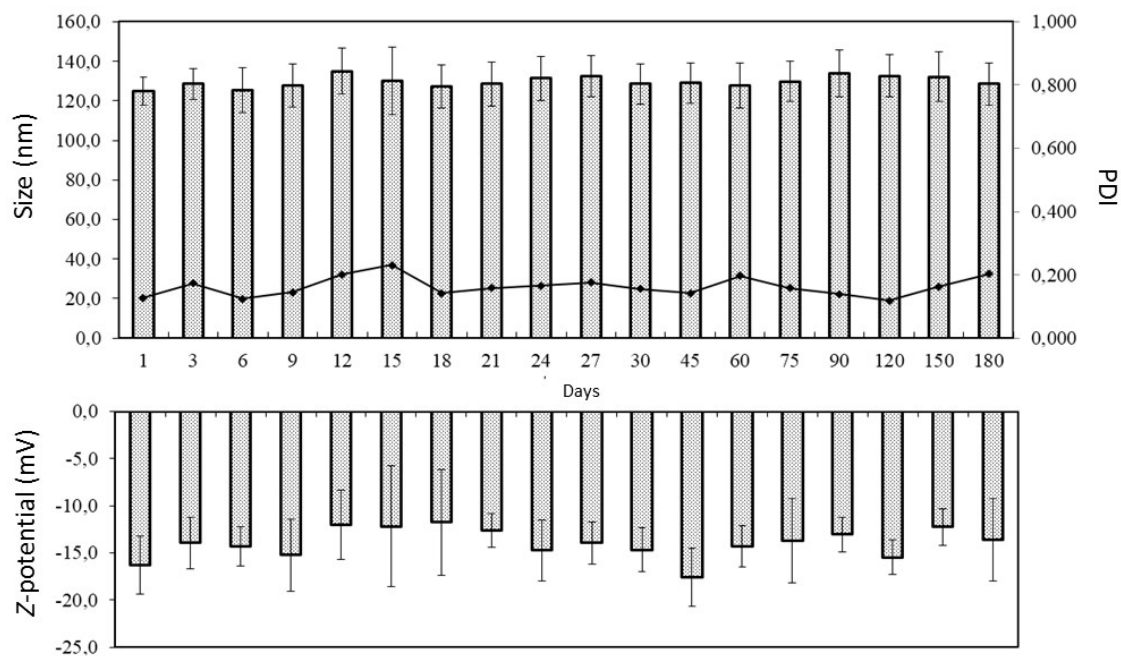

**Fig 2:** The long term stability of ultradeformable liposome with Span 80 (UDLS80) for 180 days.

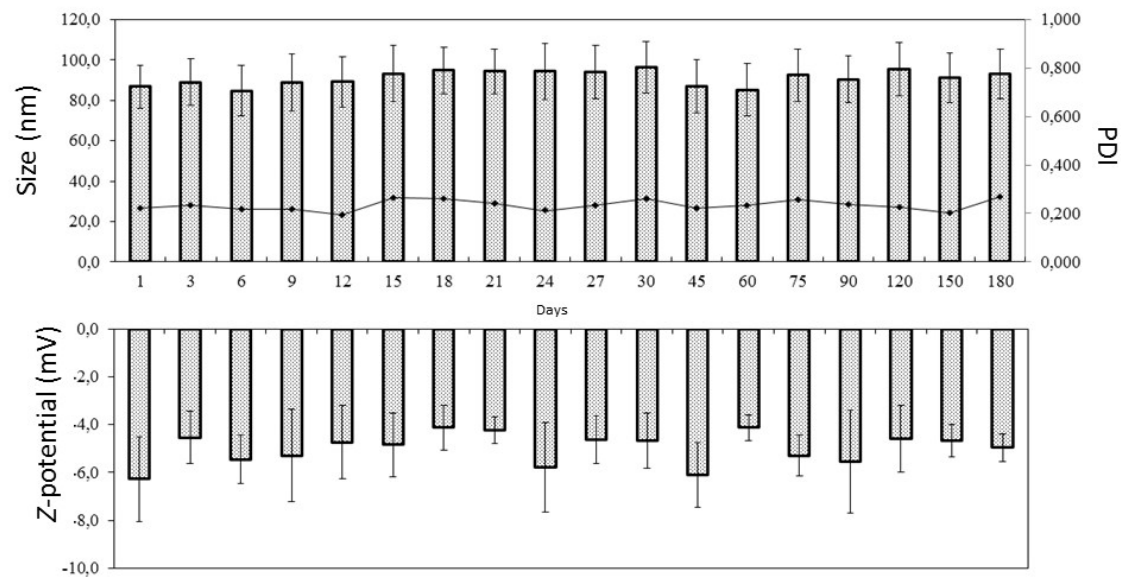

**Fig 3:** The long term stability of ultradeformable liposome with Tween 80 incorporated with PcAlCl (UDLT80Pc) for 180 days.

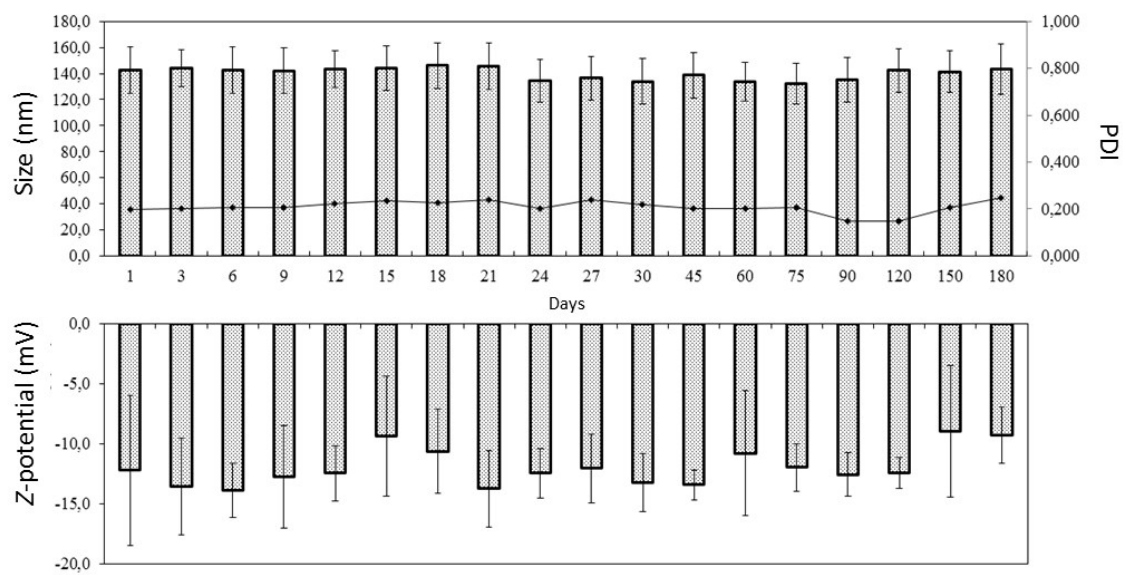

**Fig 4:** The long term stability of ultradeformable liposome with Span 80 incorporated with PcAlCl (UDLS80Pc) for 180 days.

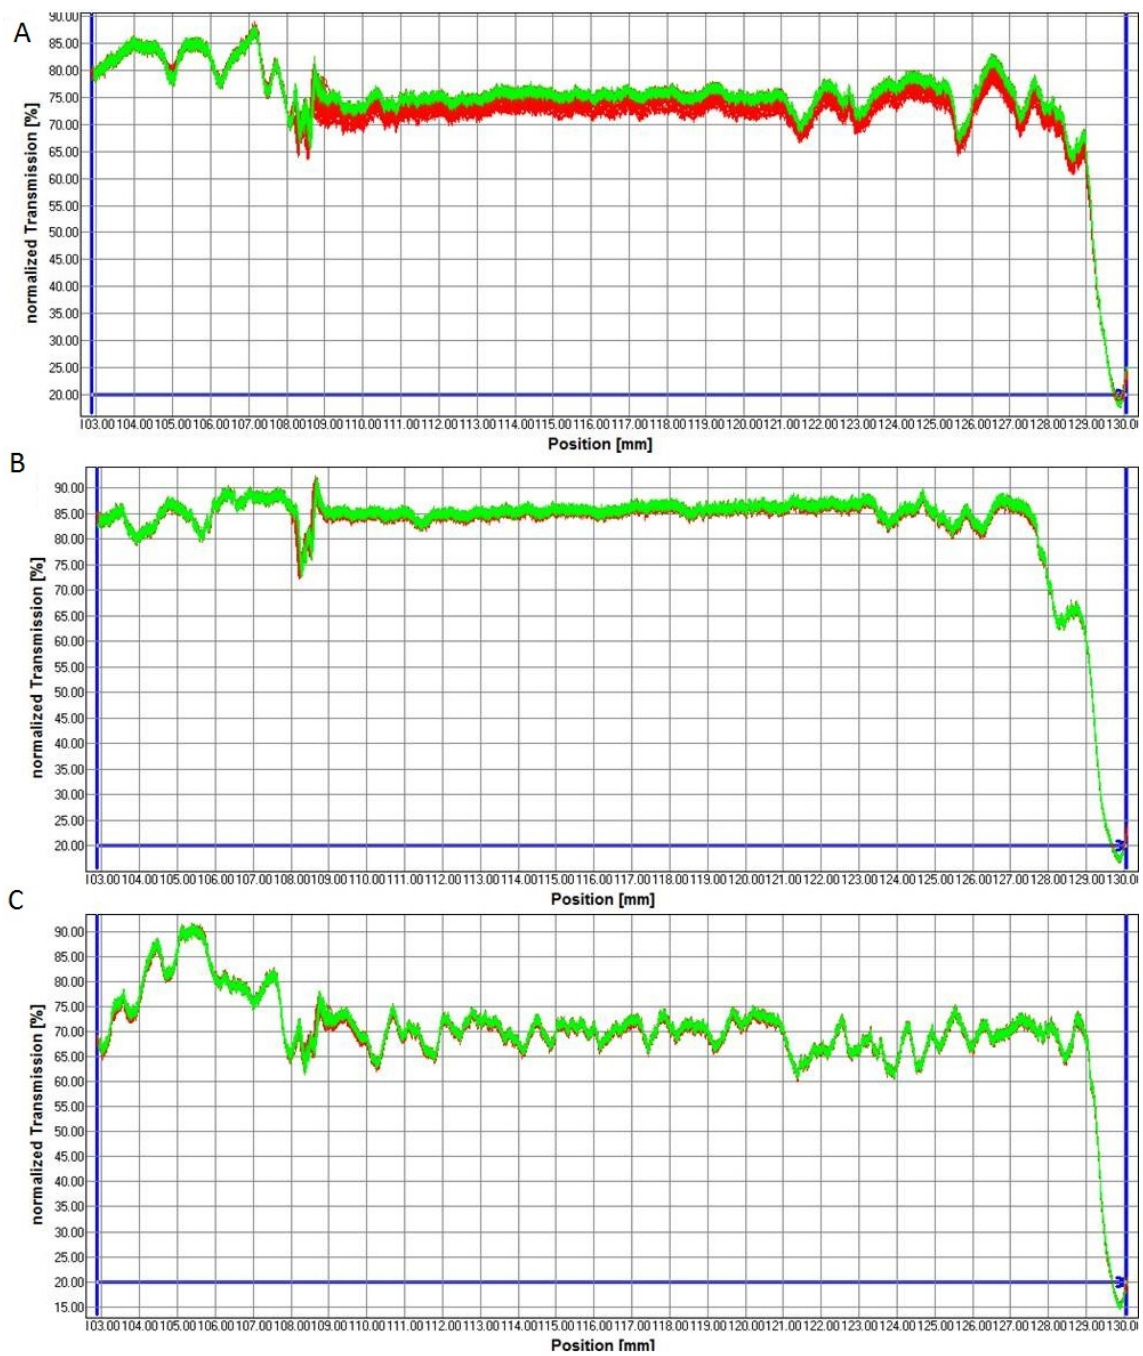

Fig 5: Transmission profiles obtained in accelerated stability. In A) Conventional Liposome (CL), B) Ultradeformable liposome with Tween 80 (UDLT80) and C) Ultradeformable liposome with Span 80 (UDLS80). The first profiles are in red and the last green.

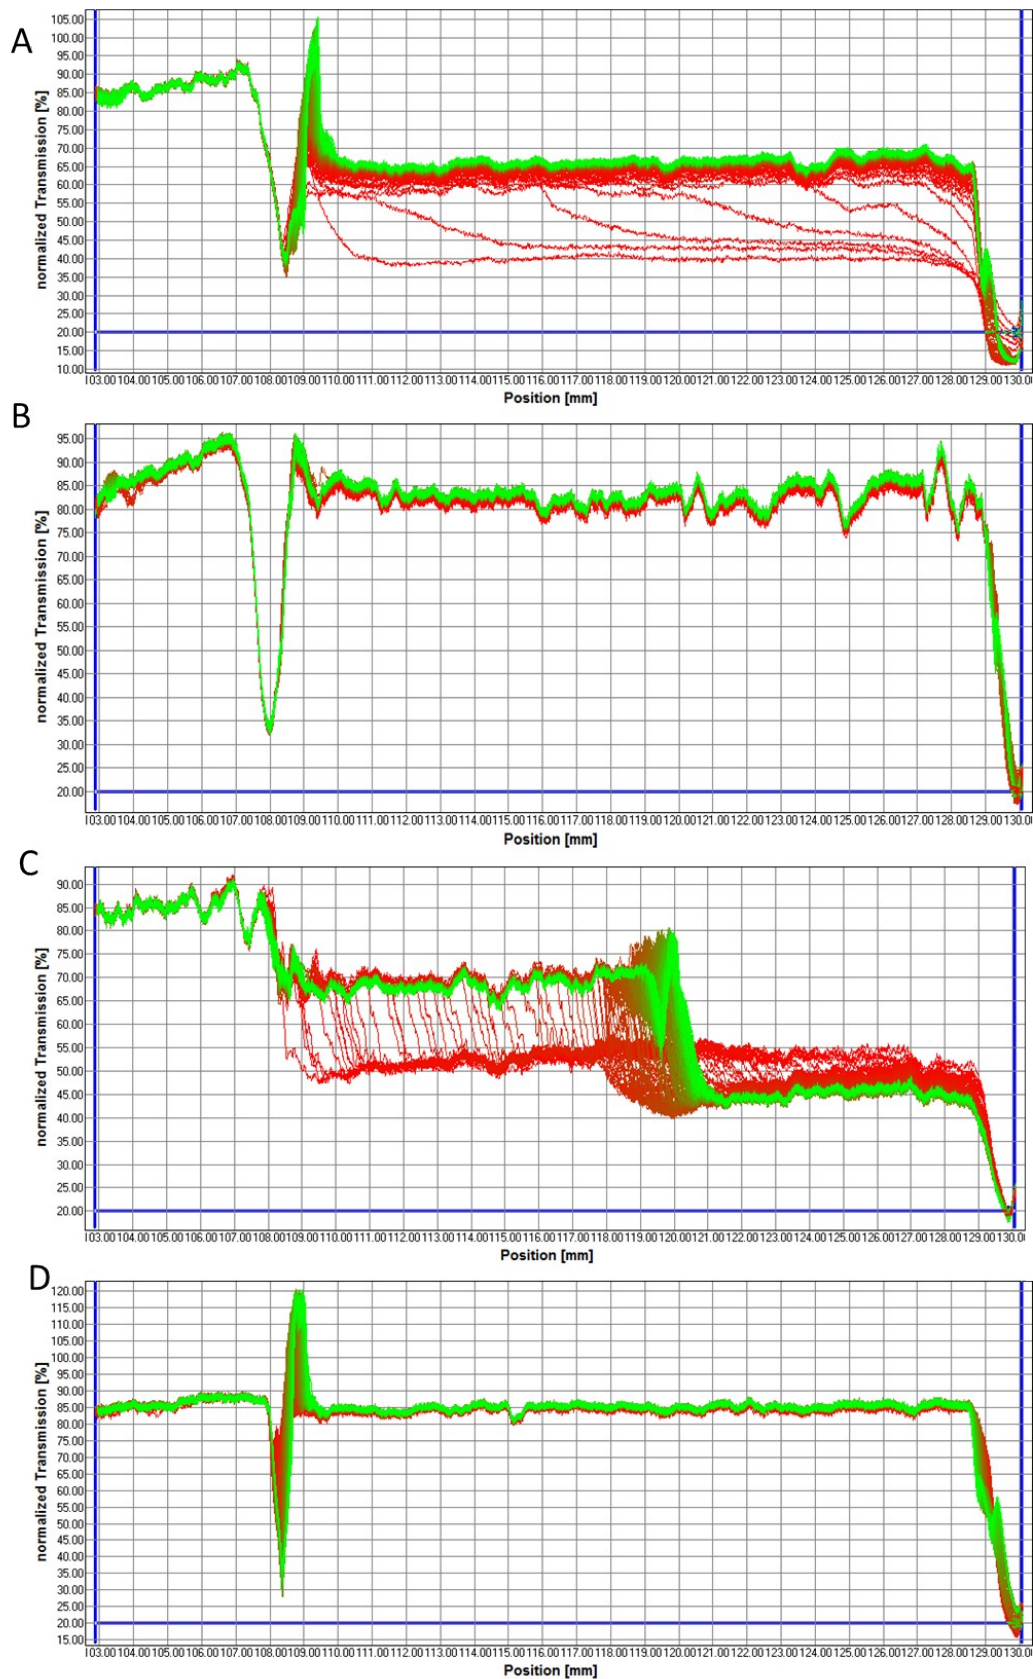

Fig 6: Transmission profiles obtained in accelerated stability. In A) Conventional Liposome incorporated with PcAlCl (CLPc), B) Ultradeformable liposome with Tween 80 incorporated with PcAlCl (UDLT80Pc), C) Ultradeformable liposome with Span 80 incorporated with PcAlCl (UDLS80Pc) and D) Ultradeformable liposome with deoxycholate sodium incorporated with PcAlCl (UDLCSpc). The first profiles are in red and the last green.
